# Supplementary material
Source: MDPI journal article supplement (https://www.mdpi.com/2073-4441/14/1/5)
Supplement: s1 [file s1]

## Supplemental Figures

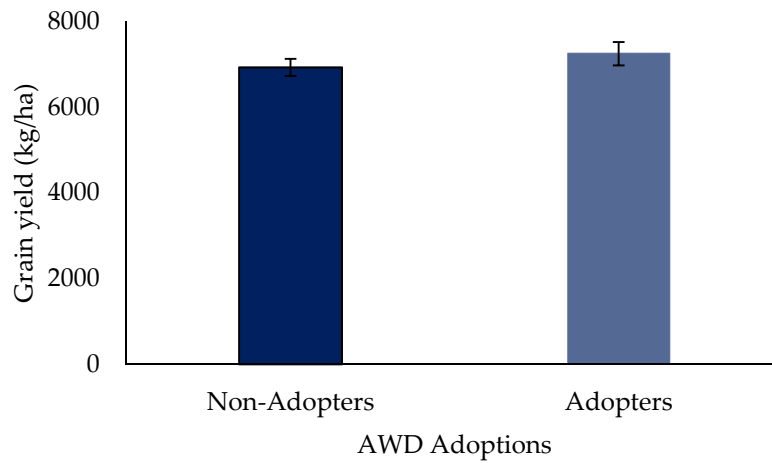

**Figure S1.** Comparison of grain yield between non-AWD adopters and AWD adopters. The error bar represents the standard error.

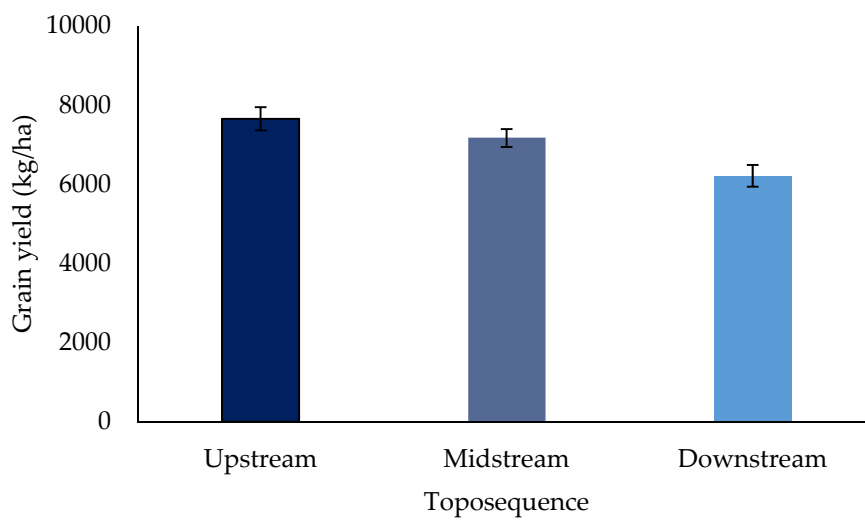

**Figure S2.** Grain yields of rice under different toposquence of field relative to the lateral canal. N=58, 51, and 54 for upstream, midstream, and downstream, respectively. The error bar represents the standard error.
